# Supplementary material for: GenFam: A web application and database for gene family‐based classification and functional enrichment analysis
Source: PubMed Central journal article supplement — Plant Direct. 2019 Dec 4;3(12):e00191. doi: 10.1002/pld3.191 (PMC6892992; doi:10.1002/pld3.191), 2019-12-04
Supplement: PLD3-3-e00191-s002.pdf [file PLD3-3-e00191-s002.pdf]

**RESPONSE TO REVIEWER COMMENTS**

**REVIEWER 1**

**Comment 1:** The author presented a new tool that allows the user to perform gene-family based enrichment analysis in 60 plant species. This serves as a great source for people to quickly identified enriched gene families. Some minor changes are required before publication.

***Reply:*** *We thank the reviewer for the positive comments and addressed the minor points as suggested in the revised manuscript.*

**Comment 2:** For the output table, rank gene families based on adjusted P-value

***Reply****: We have updated GenFam code (v1.1) to provide output results table ranked from lowest to highest adjusted P-value/FDR. Below is a screenshot of the revised gene family outputs.*


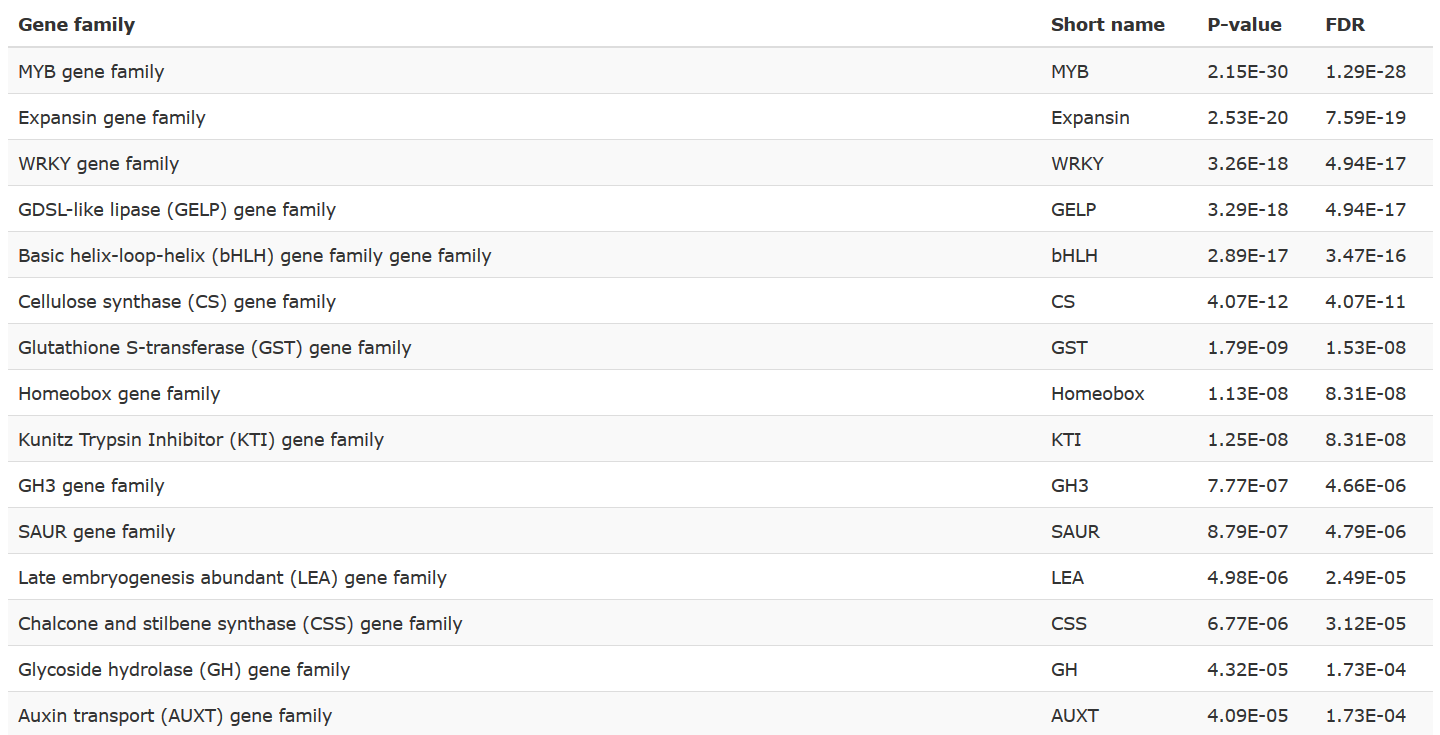


**Comment 2:** In the output, provide the probability that a gene was assigned to a specific family.

***Reply:*** *F*or the gene assignment/classification part, we do not need to compute any probabilities, since it is performed based on mapping of input gene IDs to the background database gene IDs to find the intersections. We estimate the probabilities for the enrichment analysis, where p-value and FDR are used to assess the probability/significance if a family of genes are overrepresented in the input list, compared to the background database. The probability values (P-value and *adjusted P-value*/FDR) are provided in the output summaries, as shown above.

**Comment 3:** List the major GO function for a specific family could help the user better learn the functions of a family

***Reply:***We agree with the reviewer comments. GenFam already provides this information. Due to web-page space constraints, they are just not displayed in the results summary page, but they can be either viewed in a separate webpage or can be downloaded. The detailed annotations include the GO categories and terms.

**REVIEWER 2**

**Comment 1:** To improve the functional annotation of differentially expressed genes from next-generation sequencing datasets, the authors introduced the incorporation of gene family-level enrichment attribute, that is currently lacking in Gene Ontology-based annotation. They implemented a web application specifically for plant species which is based on their classification of 384 unique plant families.

***Reply:*** *We thank the reviewer for the positive comments.*

**Comment 2**: In the "background database" sub-section of the "materials and methods" section the authors did not clearly define what they meant by "background databases".

***Reply:*** *We have added more explanation about the background database that is used for GenFam implementation in the revised manuscript.*

*“**For GenFam implementation, we have leveraged publicly available plant genome resources of Phytozome (v12) and developed a curated database that serves as the background reference. All gene IDs within a user-defined input list are mapped to this reference database to assign genes into families, and subsequently overrepresented gene families in the input list are computed by comparing to the background database”.*

**Comment 3**: To provide flexibility in the types of gene IDs that a user can submit, the authors permit the use of PAC IDs. Are the Phytozome PAC IDs guaranteed to be consistent in between current and future gene annotations at JGI?

***Reply:*** *As new versions of Phytozome are released, we will also release updates to the GenFam to keep it up to date on future annotations and nomenclature. In the current version of GenFam (v1.0), the gene family classification has been performed using the latest Phytozome v12.0 database and PAC IDs.*

**Comment 4**: In the "Output summary" sub-section of the "materials and methods" section, would it be better to move the first paragraph of the section into the "results and discussion" section, and also to move the second paragraph into the "Web server implementation" sub-section?

***Reply:*** *We thank the reviewer for the suggestion. We made the suggested changes in the revised manuscript.*

**REVIEWER 3**

**Comment 1:** This manuscript is an updated version of a study that was previously published without peer review at bioRxiv: doi:[https://doi.org/10.1101/272187](https://urldefense.proofpoint.com/v2/url?u=https-3A__doi.org_10.1101_272187&d=DwMGAg&c=u6LDEWzohnDQ01ySGnxMzg&r=nBRWAswEPSOAzfrb6UpqiXheSe0E8aS6GACJcIHQ55E&m=85_Dn-pJG8PZCF7-ON6pDsbB6RTyxCwKNd7BffpgBnI&s=WKZClRrlENMiDhNF5e_vQBQ0MPPtyMU1Hk9-ejhe8PQ&e=). This paper describes the features of a new web-based resource, GenFam for analysis of gene expression data sets based on gene family rather than most commonly deployed gene ontology. The new tool is based on reclassification of the gene/protein space of sixty completed genomes using hidden Markow models (HMM) and PFAM analysis into 384 gene families. Comparative utility of the new tool is demonstrated using four previously published RNA seq data sets of differential gene expression in response to biotic or abiotic factors in diverse plant species. The analysis shows that the new method is comprehensive, between 60 -80 % of differentially expressed genes can be assigned to a GenFam category. In the specific examples GenFam analysis clearly confirmed previous results and, in each case, revealed new gene classes not previously reported. Moreover, comparison of results obtained with GenFam to other methods deploying gene family membership showed improved resolution with the former due to the much higher number of gene families in the GenFam database. Finally, statistical analysis of the gene expression data is more robust as differences are expressed using all classified genes instead of the whole gene space as reference. Thus, the authors make a compelling case that motif-based protein classification is complementary to and may have distinct advantages over Blast-based GO ontology when applied to plant gene expression analysis. The paper is very well written. The style is concise and clear. The work will be of interest to a broad readership of plant biologists.

***Reply:*** *We thank the reviewer for the positive comments.* *To make our new resource accessible widely to all researchers, we have submitted it to the BioRxiv preprint server before submission to the peer-reviewed journal.*
